# Supplementary material for: Highly-efficient and stable warm white emission from perovskite/silica composites with photoactivated luminescence enhancement
Source: Royal Society of Chemistry journal article supplement (doi:10.1039/d0tc03249b), 2020-01-01
Supplement: d0tc03249b1.pdf [file d0tc03249b1.pdf]

Electronic supplementary information

**Stable warm white light from UV-driven LEDs based on perovskite/silica composites with photoactivated luminescence enhancement**

Shuaiqi Wang<sup>‡</sup>, Duobin Wu<sup>‡</sup>, Shuming Yang, Hongyu Zhen, Zhenghuan Lin\*, Qidan Ling

*Fujian Key Laboratory of Polymer Materials, College of Chemistry and Materials Science, Fujian Normal University, Fuzhou 350007, Fujian, China*

*E-mail: zhlin@fjnu.edu.cn*

*‡ These authors contributed equally to the experimental work.*

**Table S1** Feeding amount of various ingredients of perovskite.

| Entry | Molar ratio (Pb:Mn) | Molar ratio (Cl:Br) | PEACl                  | PEABr                  | MnBr <sub>2</sub>        | PbBr <sub>2</sub>        |
|-------|---------------------|---------------------|------------------------|------------------------|--------------------------|--------------------------|
| 1     | 1:2                 | 1.5:2.5             | 0.3 mmol<br>(47.26 mg) | 0.1 mmol<br>(20.20 mg) | 0.4/3 mmol<br>(28.67 mg) | 0.2/3 mmol<br>(24.70 mg) |
| 2     | 1:1                 | 1.5:2.5             | 0.3 mmol<br>(47.26 mg) | 0.1 mmol<br>(20.20 mg) | 0.2/2 mmol<br>(21.50 mg) | 0.2/2 mmol<br>(36.70 mg) |
| 3     | 3:1                 | 1.5:2.5             | 0.3 mmol<br>(47.26 mg) | 0.1 mmol<br>(20.20 mg) | 0.2/4 mmol<br>(10.76 mg) | 0.2/4 mmol<br>(55.06 mg) |
| 4     | 1:0                 | 1.5:2.5             | 0.3 mmol<br>(47.26 mg) | 0.1 mmol<br>(20.20 mg) | 0                        | 0.2 mmol<br>(73.4 mg)    |
| 5     | 1:1                 | 1:3                 | 0.2 mmol<br>(31.50 mg) | 0.2 mmol<br>(40.40 mg) | 0.2/2 mmol<br>(21.50 mg) | 0.2/2 mmol<br>(36.70mg)  |
| 6     | 1:1                 | 2:2                 | 0.4 mmol<br>(63.0 mg)  | 0                      | 0.2/2 mmol<br>(21.50 mg) | 0.2/2 mmol<br>(36.70 mg) |

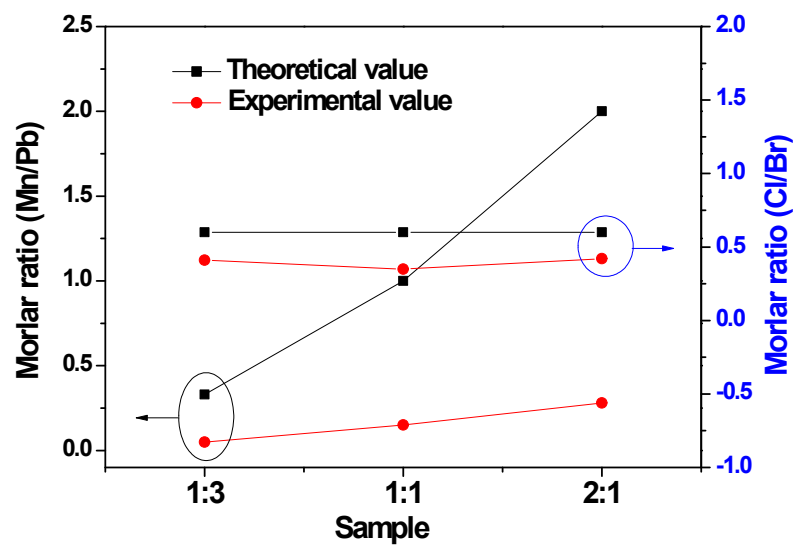

**Fig. S1** Ratio of Mn/Pb and Cl/Br in the perovskites composite film measured by EDS.

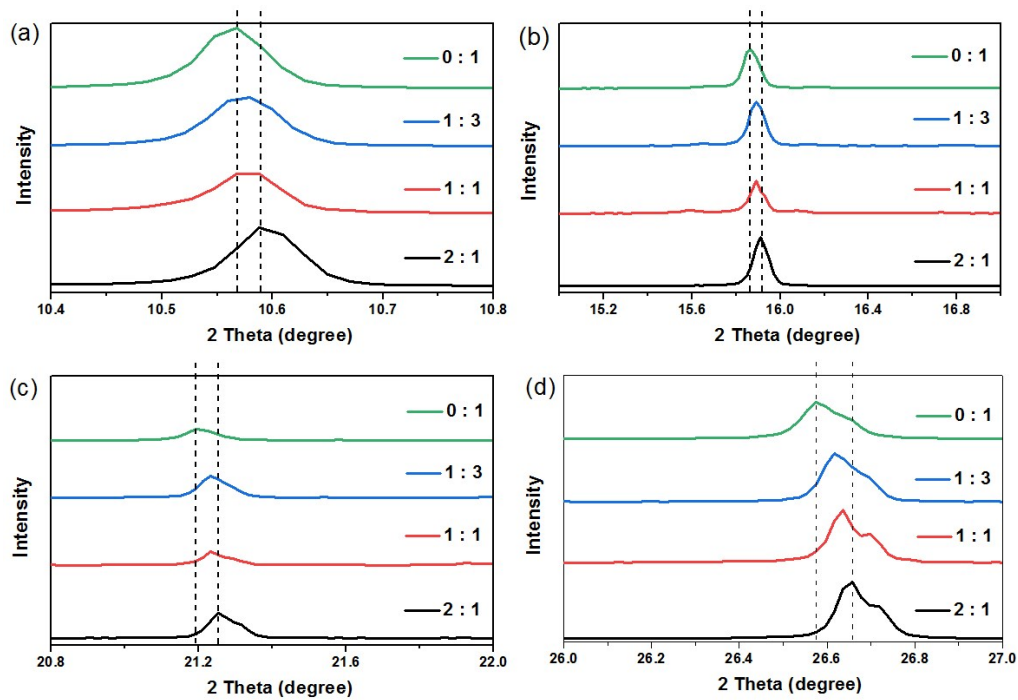

**Fig. S2** Partial enlarged XRD curves of perovskite powders with different ratio of Mn/Pb.

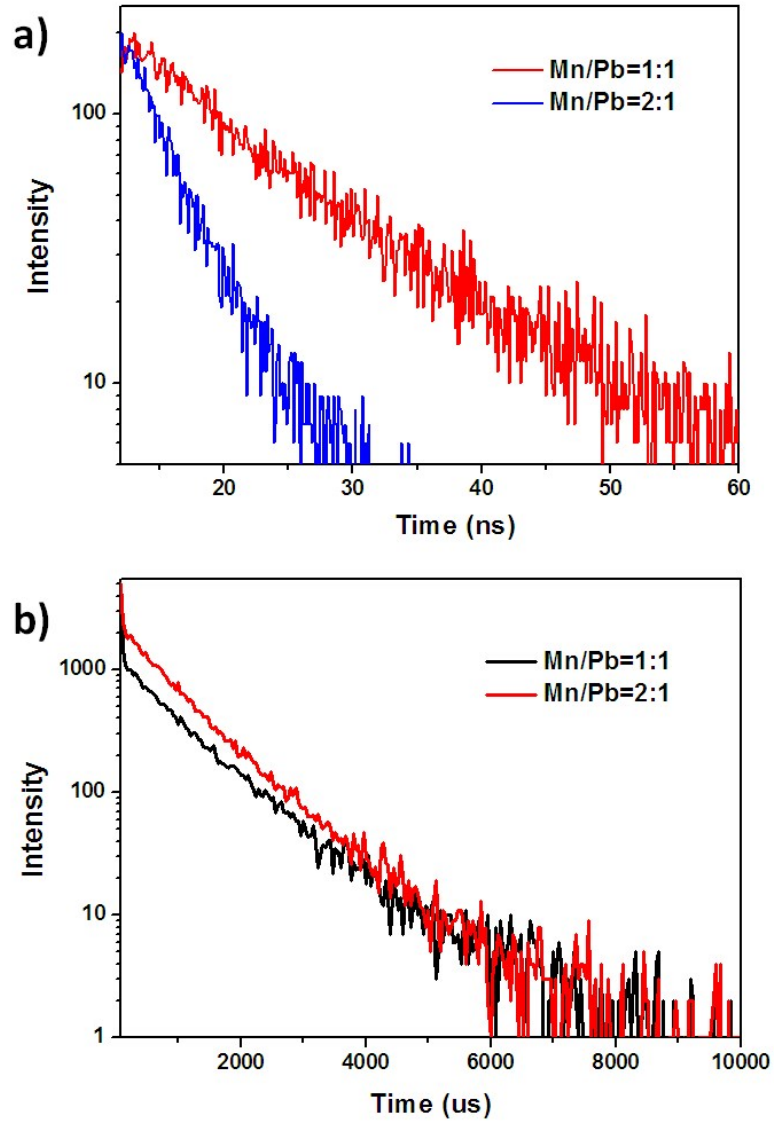

**Fig. S3** Photoluminescent decay profiles of composite films with different Mn/Pb ratio monitored at 400 nm (a) and 610 nm (b).

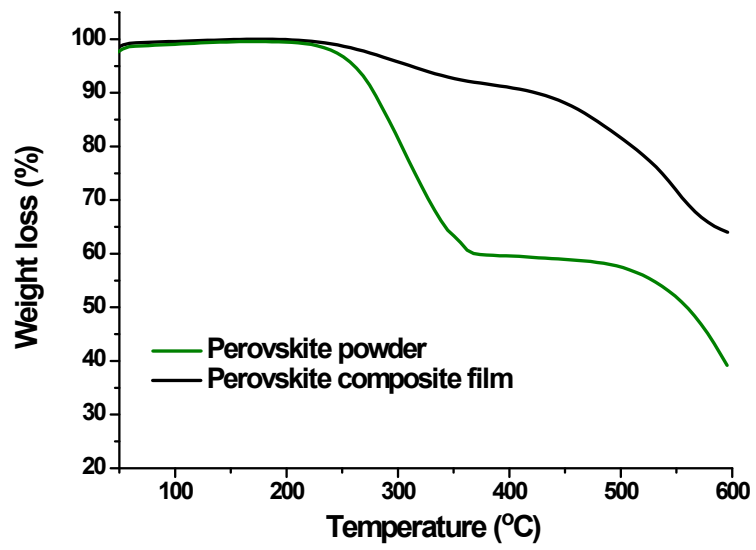

Fig. S4 TGA curve of perovskite composite film with 1:1 of Mn/Pb.

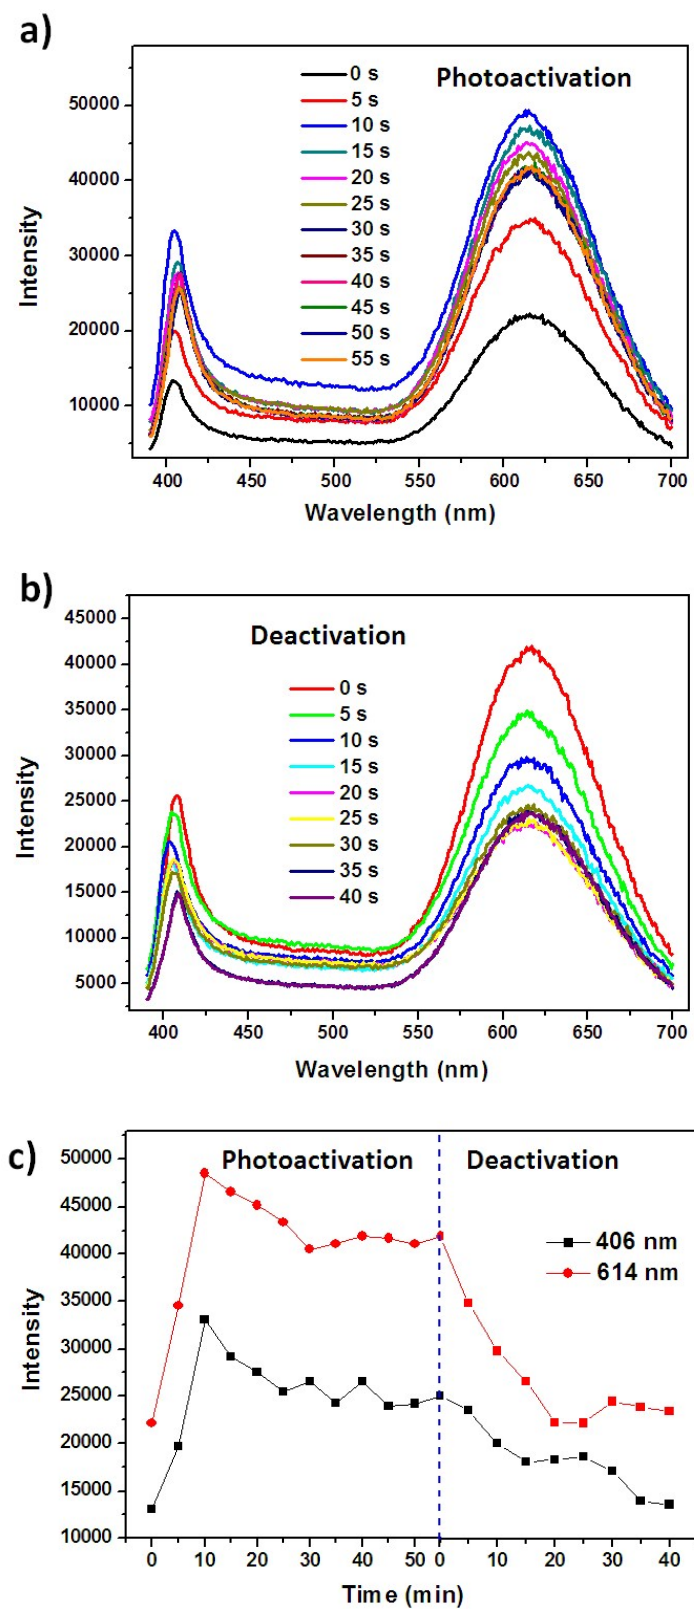

**Fig. S5** Changes of photoluminescent spectra of composite film in the process of photoactivation (a) and deactivation (b). Changes of emissive intensity of composite film at 406 nm and 614 nm (c).

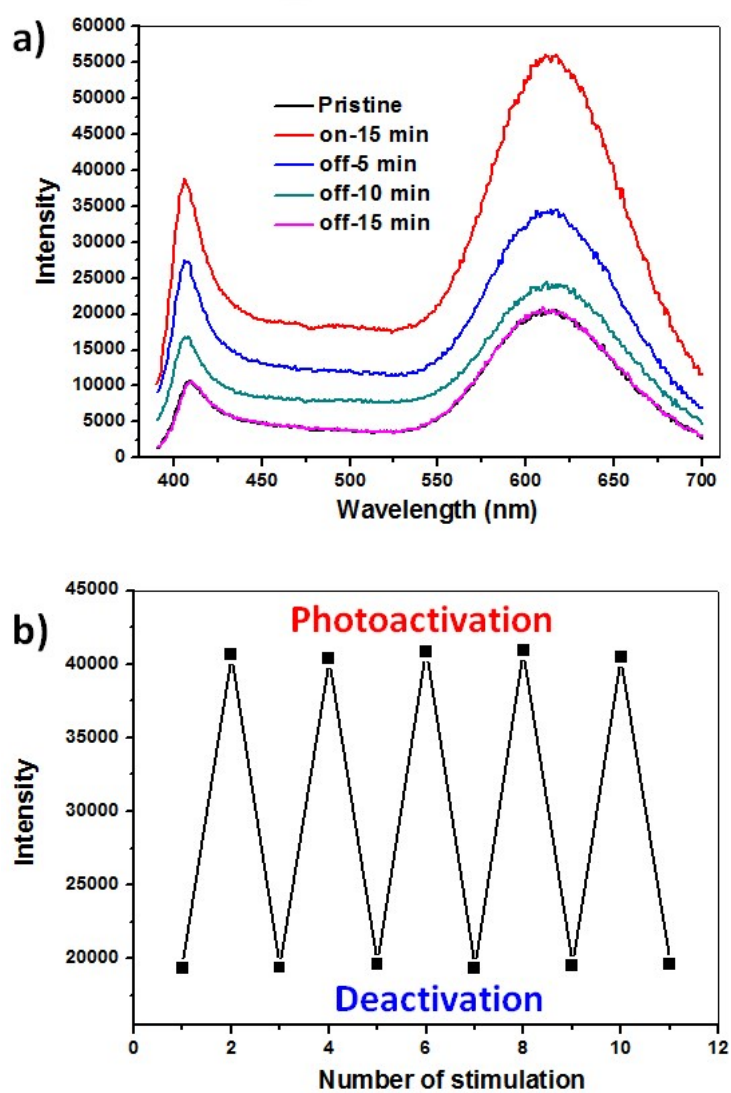

**Fig. S6** a) Changes of photoluminescent spectra of composite film in the process of deactivation (off) after 15 min of photoactivation (on-15 min). b) Changes of emissive intensity of film at 614 nm in the repeated photoactivation process.



**Table S2** Lifetime of perovskite powder and composite film before and after photoactivation of 50 min.

| Sample             | Before/After photoactivation | Lifetime    |             |
|--------------------|------------------------------|-------------|-------------|
|                    |                              | 400 nm (ns) | 610 nm (us) |
| Perovskite powders | Before                       | 11.4        | 922         |
|                    | After                        | 13.59       | 972         |
| Composite films    | Before                       | 3.96        | 872         |
|                    | After                        | 10.54       | 951         |

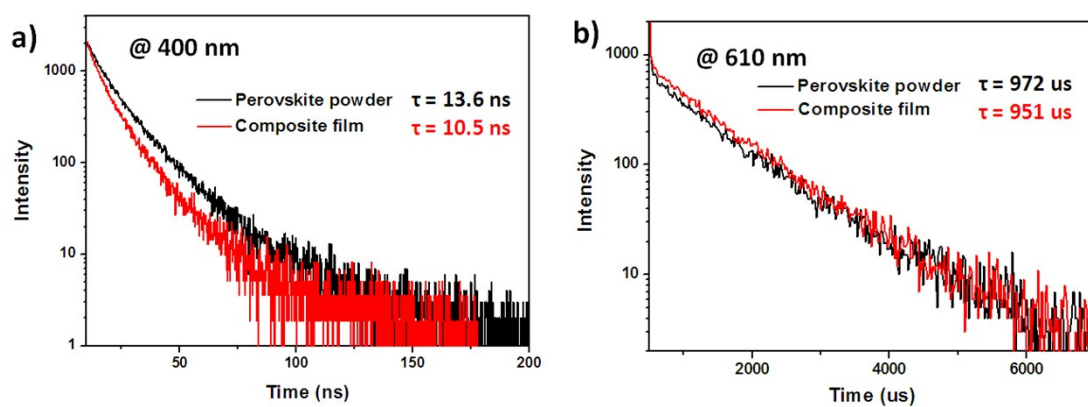

**Fig. S7** Photoluminescent decay profiles of photoactivated perovskite powder and composite film monitored at 400 nm (a) and 610 nm (b).

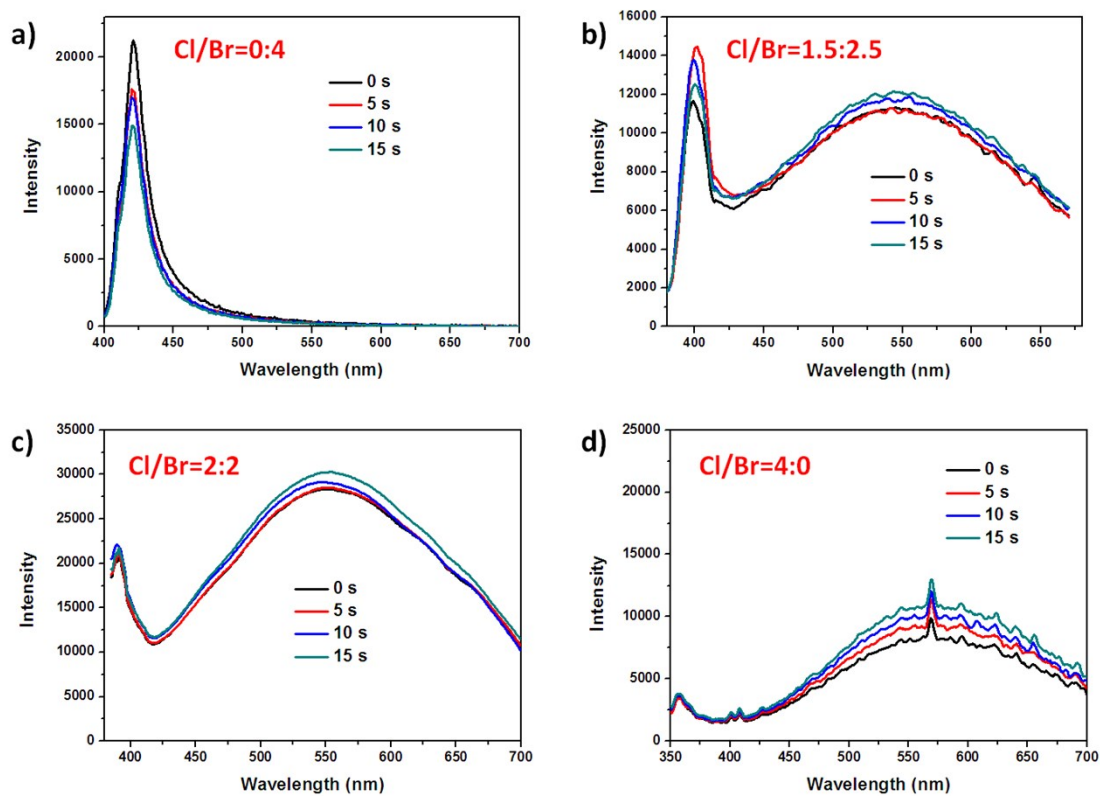

**Fig. S8** Changes of photoluminescent spectra of undoped perovskite powders with different Cl/Br ratio in 15 min of photoactivation.

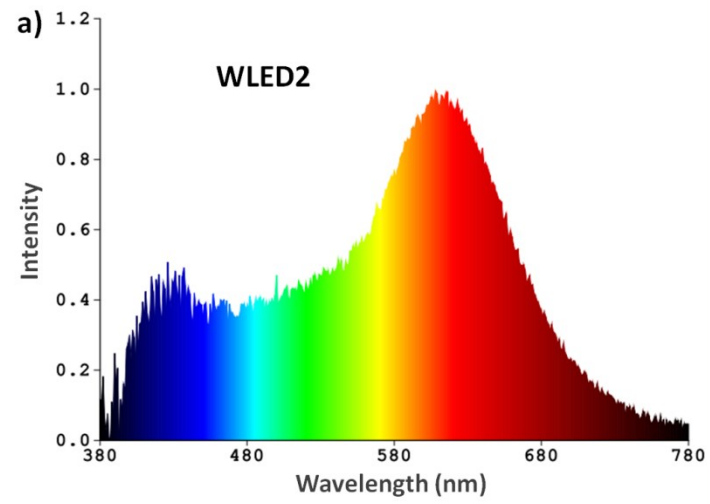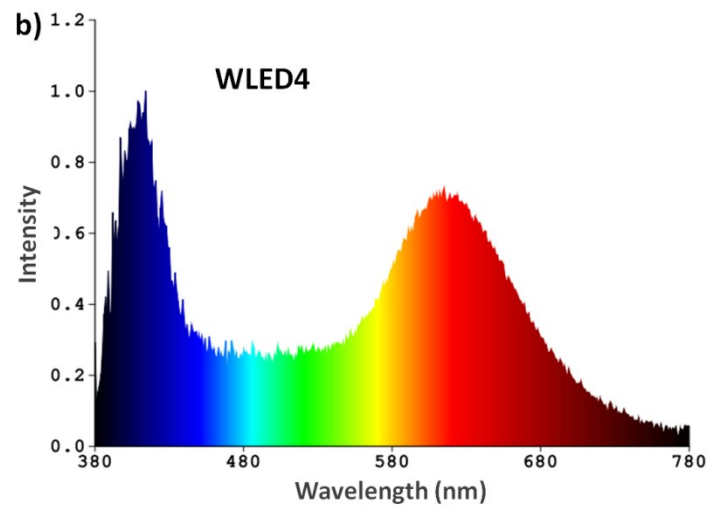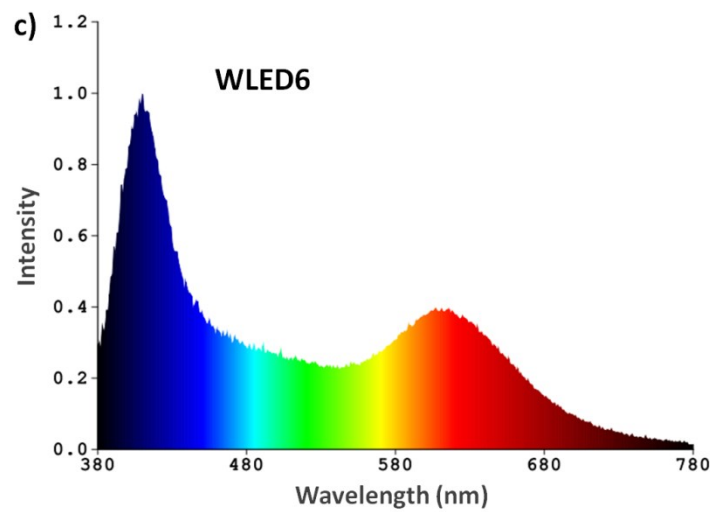

**Fig. S9** Electroluminescence spectra of device WLED2 (a), WLED4 (b), and WLED6 (c).
